# Supplementary material for: A hybrid nanozymes in situ oxygen supply synergistic photothermal/chemotherapy of cancer management
Source: Royal Society of Chemistry journal article supplement (doi:10.1039/d1bm00667c), 2021-01-01
Supplement: d1bm00667c1.pdf [file d1bm00667c1.pdf]

# Supporting Information of

## A Hybrid Nanozymes in situ Oxygen Supply Synergistic Photothermal-/Chemotherapy of Cancer Management

Xufeng Zhu<sup>a,b,1</sup>, Xu chen<sup>a,b,1</sup>, Dongliang Huo<sup>a,b</sup>, Jieqiong Ceng<sup>a,b</sup>, Zhi Jia<sup>a,b</sup>,  
Yanan Liu<sup>a,\*</sup>, Jie Liu<sup>a,b,\*</sup>

a.Shenzhen Longhua Maternity and Child Healthcare Hospital, Shenzhen,  
518110, China.

b.Department of Chemistry, College of Chemistry and Materials Science, Jinan  
University, Guangzhou 511436, People's Republic of China.

E-mail: [yananliu0321@163.com](mailto:yananliu0321@163.com); [tliuliu@jnu.edu.cn](mailto:tliuliu@jnu.edu.cn).

\*Corresponding author.

<sup>1</sup>These authors contributed equally to the work.

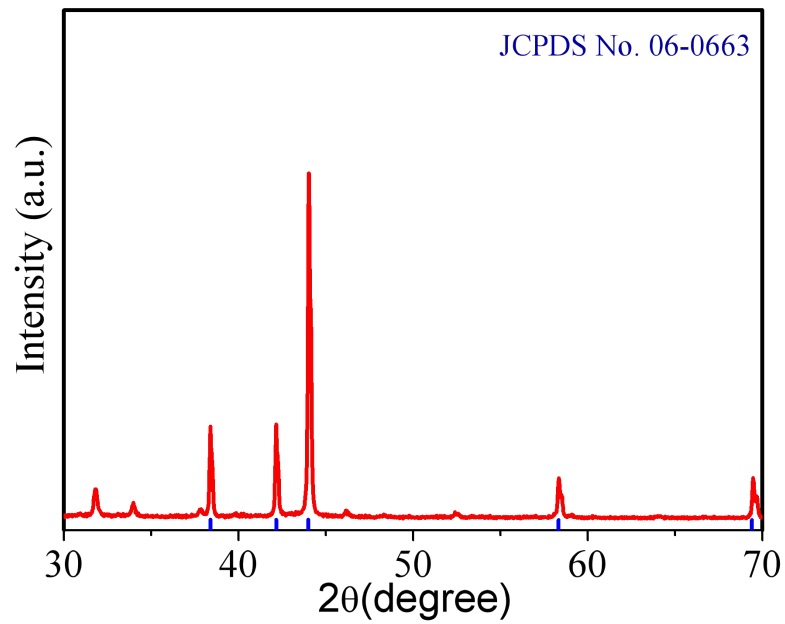

**Figure S1.** XRD results of Ru NPs.

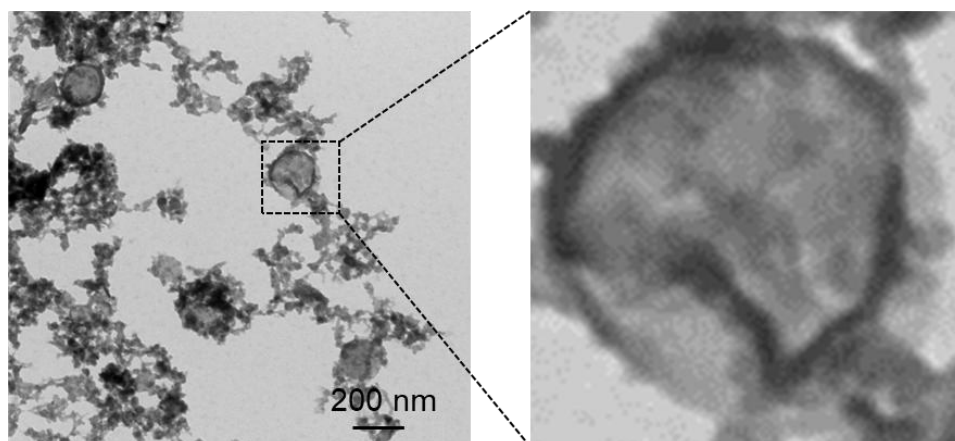

**Figure S2.** TEM micrograph of erythrocyte membrane vesicles. RBCm has a particle size of approximately 200 nm.

Magnified image shows that RBCm has a good saclike appearance [1, 2].

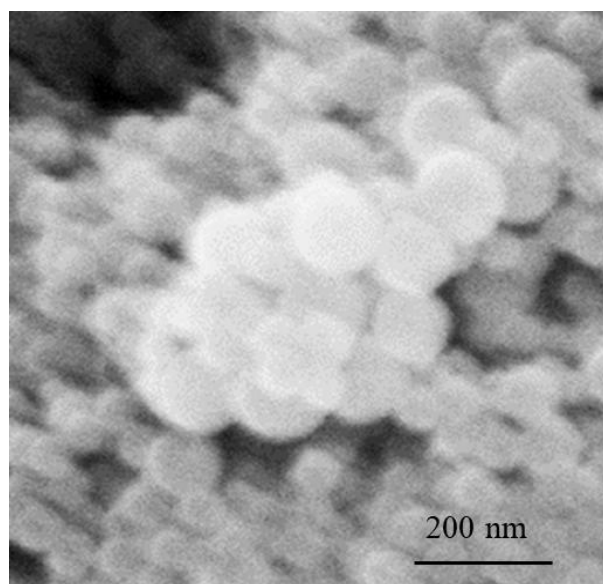

**Figure S3.** SEM micrograph of RBCm@Ru@MnO<sub>2</sub>, it has good spherical morphology and dispersion.

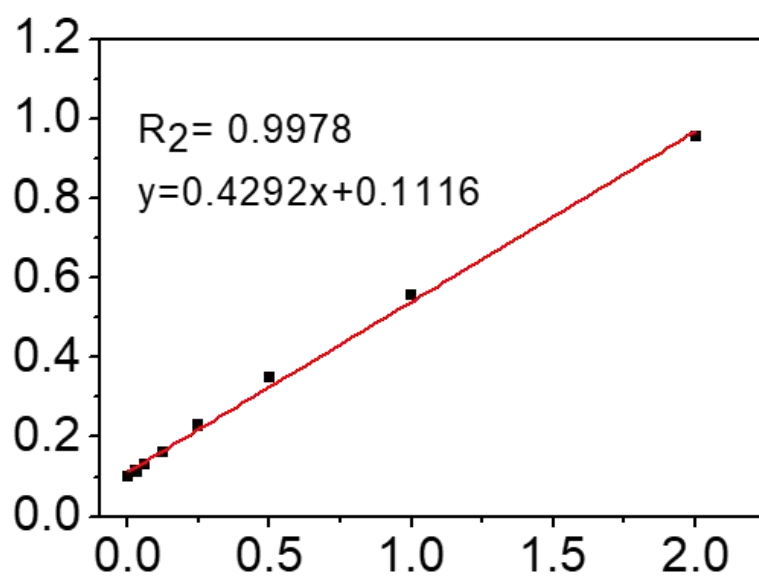

**Figure S4.** BCA kit test protein of RBCm@Ru@MnO<sub>2</sub>, the surface protein loading rate of RBCm@Ru@MnO<sub>2</sub> was determined by the BCA kit to be about 53.28% [3].

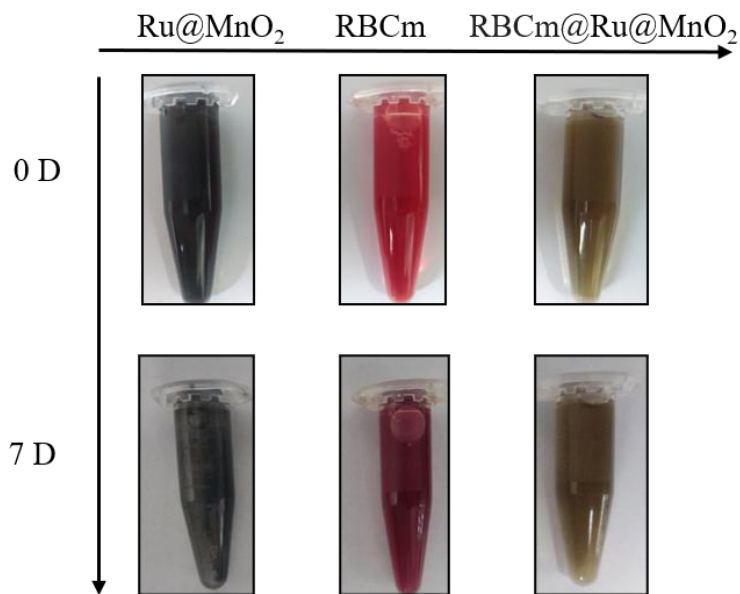

**Figure S5.** The particle size changes of Ru@MnO<sub>2</sub> and RBCm@Ru@MnO<sub>2</sub> after being placed in cell culture medium (pH 7.4) for 7 days. Compared with Ru@MnO<sub>2</sub>, RBCm@Ru@MnO<sub>2</sub> still has good dispersion, it is indicated that the coating of the erythrocyte membrane can give Ru@MnO<sub>2</sub> a good physiological activity.

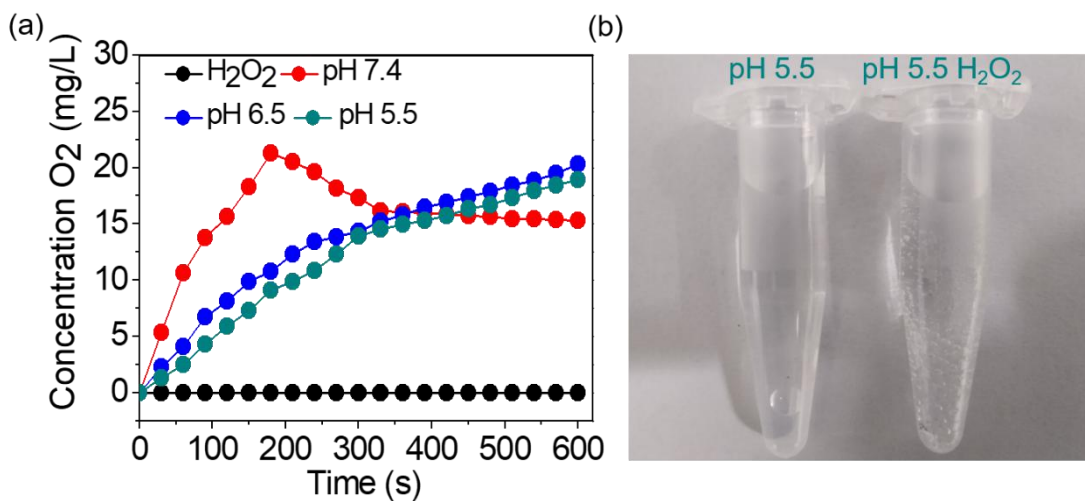

**Figure S6.** Pictures of RBCm@Ru-MnO<sub>2</sub>@DOX dispersed in dispersed in pH 5.5 solutions with or without H<sub>2</sub>O<sub>2</sub>. Produces a large amount of O<sub>2</sub> to alleviate the hypoxia of solid tumors and indirectly prevent tumor cell regeneration

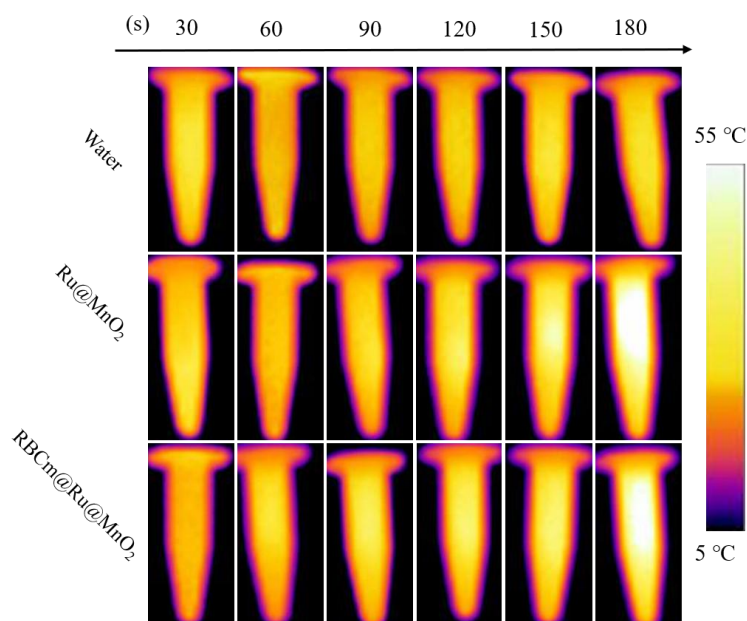

**Figure S7.** Infrared thermal images of Water, Ru@MnO<sub>2</sub> and RBCm@Ru@MnO<sub>2</sub>.

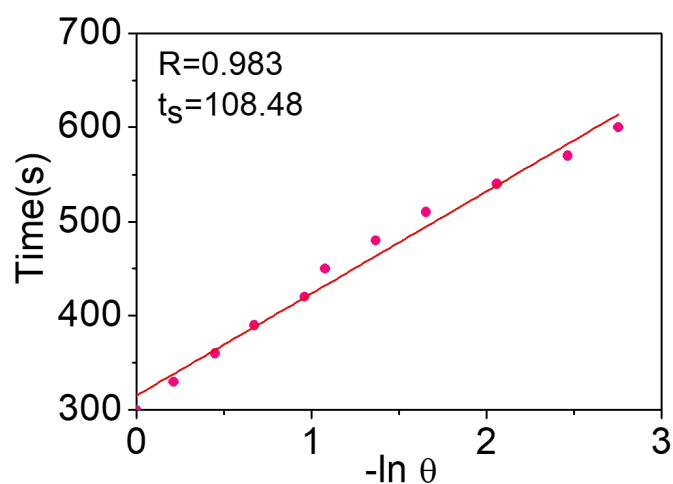

**Figure S8.** Linear time data *versus* -lnθ obtained from the cooling period. RBCm@Ru-MnO<sub>2</sub> exhibited high photothermal conversion efficiency (36.99%).

The photothermal conversion efficiency ( $\eta$ ) of RBCm@Ru-MnO<sub>2</sub> can be calculated as following equations:

$$\eta = [hs(T_{\max} - T_{\text{surr}}) - Q_{\text{dis}}] / [I(1 - 10^{-A_{808}})] * 100\%$$

Where  $\eta$  is the photothermal conversion efficiency ( $\times 100\%$ ),  $T_{\max}$  is the highest temperature of the sample,  $T_{\text{surr}}$  is the

ambient temperature (unit: °C), I is the laser power used, A808 is the absorbance value (dimensionless) of the sample at the excitation wavelength, Q<sub>dis</sub> is the change in heat when the reagent is blank, h is the thermal conversion efficiency of the system and S is the surface area of the vessel. The value of Q<sub>dis</sub> can be determined separately from the reagent blank.

$$hs = (m \cdot C_{H_2O})/T_s$$

Where m is the mass of the solution (unit: g), C<sub>H<sub>2</sub>O</sub> is the specific heat capacity of water (4.2 J × g<sup>-1</sup> × °C<sup>-1</sup>), T<sub>s</sub> is the time constant of the system (dimensionless). The value of T<sub>s</sub> can be calculated by equation (3):

$$t = -T_s \ln(\Theta) = -T_s \ln(T - T_{surr}) / (T_{max} - T_{surr})$$

Where t is the time during cooling (unit: s), Θ is the thermal drive constant, T is the instantaneous temperature at t time, T<sub>max</sub> is the highest temperature of the sample. T<sub>surr</sub> is the ambient temperature, thus the T<sub>s</sub> value can be obtained by linearly fitting the negative value of the cooling time to the natural logarithm of the thermal drive constant [4].

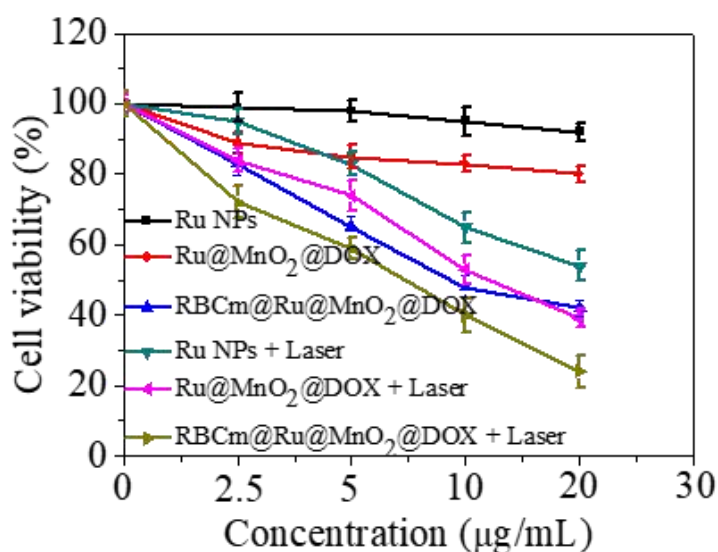

**Figure S9.** MTT of RBCm@Ru@MnO<sub>2</sub>@DOX with or without Laser. Chemotherapy/photothermal therapy significantly inhibits the activity of tumor cells.

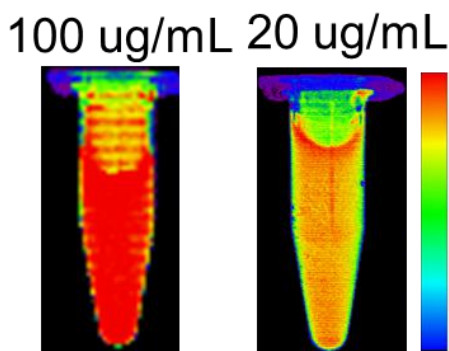

**Figure S10.** Degree of fluorescence on RBCm@Ru@MnO<sub>2</sub>@DOX, the fluorescence density of RBCm@Ru@MnO<sub>2</sub>@DOX appears to be positively correlated with the concentration of RBCm@Ru@MnO<sub>2</sub>@DOX.



Indicates the possibility that it can be used for in vivo tracking.

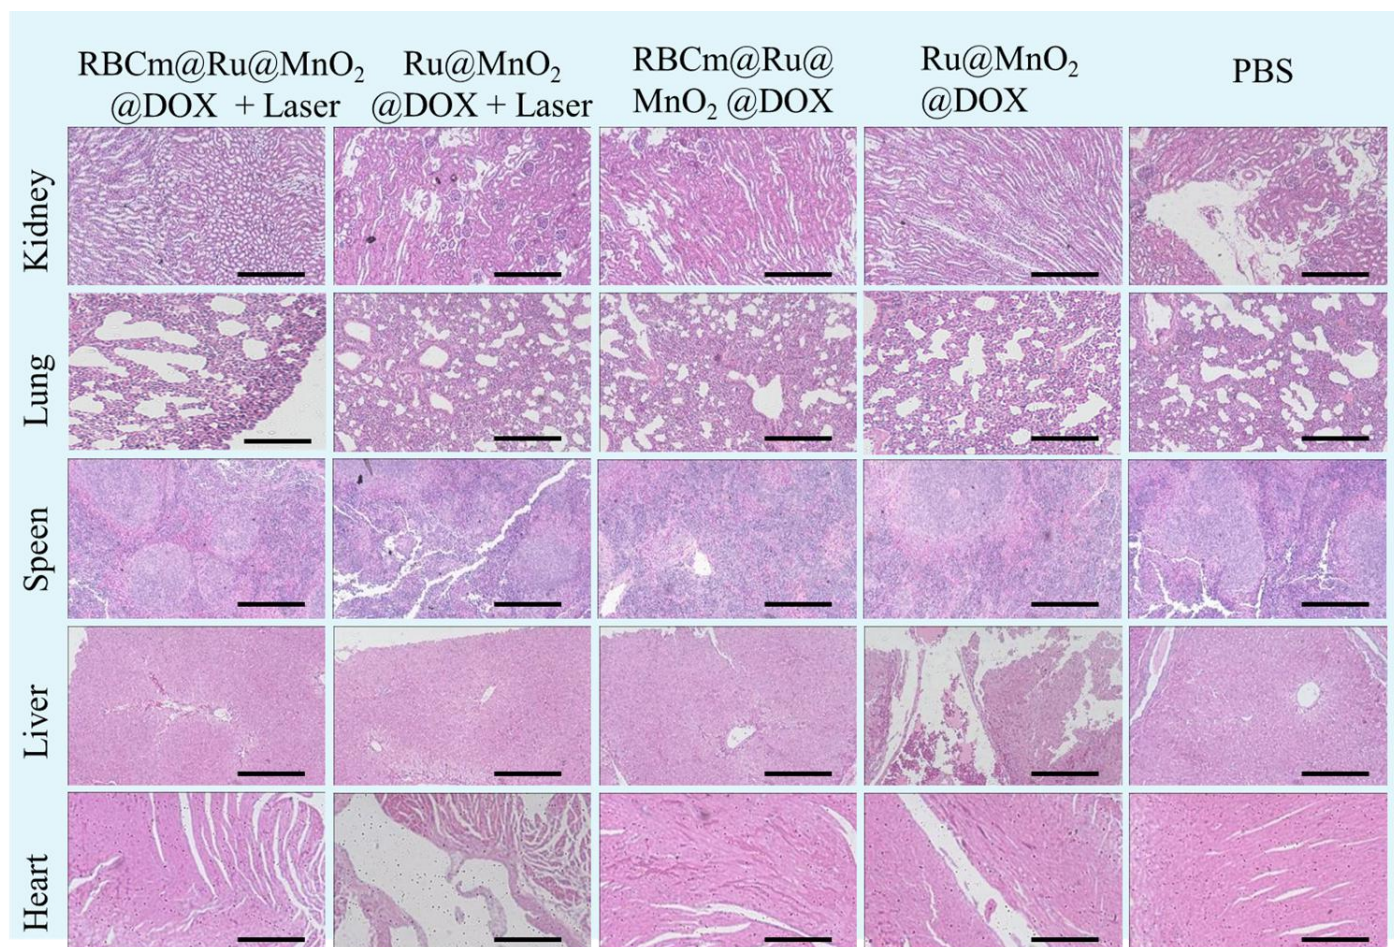

**Figure S11.** Histological analyses of the major tissues after therapy with Ru@MnO<sub>2</sub>@DOX, RBCm@Ru@MnO<sub>2</sub>@DOX with Laser (1W/cm<sup>2</sup>) or without Laser. The results indicate good safety for normal tissues at given drug concentration. Scale bar: 100  $\mu$ m.

## References

- [1] Chen, W.; Zeng, K.; Liu, H.; Ouyang, J.; Wang, L.; Liu, Y.; Wang, H.; Deng, L.; and Liu, Y. Cell Membrane Camouflaged Hollow Prussian Blue Nanoparticles for Synergistic Photothermal-/Chemotherapy of Cancer. *Adv. Funct. Mater.* **2017**, 1605795.
- [2] Zhang, L.; Wang, Z.; Zhang, Y.; Cao, F.; Dong, K.; Ren, J.; and Qu, X.; Erythrocyte Membrane Cloaked Metal-Organic Framework Nanoparticle as Biomimetic Nanoreactor for Starvation-Activated Colon Cancer Therapy. *ACS Nano.* **2018**, 12, 10201–10211.
- [3] FRED V. PLAPP, MARK M. KOWALSKI, LOWELL TILZER, PEGGY J. BROWN, JAMES EVANS, AND MASAHIRO CHIGA. Partial purification of Rho (D) antigen from Rh positive and negative erythrocytes. *Proceedings of the National Academy of Sciences.* **1979**, 76, 2964–2968.
- [4] Xiao, Z.; Xu, C.; Jiang, X.; Zhang, W.; Peng, Y.; Zou, R.; Huang, X.; Liu, Q.; Qin, Z.; and Hu, J. Hydrophilic bismuth sulfur nanoflower superstructures with an improved photothermal efficiency for ablation of cancer cells. *Nano Research.* **2016**, 9, 1934-1947.
